# 1   Reproduction has different costs for 2   immunity and parasitism in a wild 3   mammal

4   Gregory F. Albery<sup>1\*</sup>, Kathryn A. Watt<sup>1</sup>, Rosie Keith<sup>1</sup>, Sean  
5   Morris<sup>1</sup>, Alison Morris<sup>1</sup>, Fiona Kenyon<sup>2</sup>, Daniel H. Nussey<sup>1</sup>,  
6   Josephine M. Pemberton<sup>1</sup>

7

8   1: Institute of Evolutionary Biology, School of Biological Sciences, University of Edinburgh,  
9   Edinburgh, UK, EH9 3FL

10   2: Moredun Research Institute, Pentlands Science Park, Bush Loan, Midlothian, UK, EH26  
11   0PZ

12

13   \*Email: [gfalbery@gmail.com](mailto:gfalbery@gmail.com)

14

15   Data Accessibility: The data supporting this work will be uploaded to Dryad on publication.

16   Author contributions: GFA collected the samples, conducted labwork, analysed the data, and  
17   drafted the manuscript; KW designed and helped to carry out the ELISAs; RK carried out  
18   some antibody extractions and ELISAs; SM and AM helped with sample collection; FK, DN,  
19   JP offered comments on methodology and theory throughout and helped draft the  
20   manuscript.

21   Keywords: disease ecology, ecoimmunology, helminths, life history, parasites, reproduction,  
22   tradeoff, wild mammal

23

## 24 Abstract

- 25 1. Life history theory predicts that reproductive investment draws resources away from  
26 immunity, resulting in increased parasitism. However, studies of reproductive tradeoffs  
27 rarely examine multiple measures of reproduction, immunity, and parasitism. It is  
28 therefore unclear whether the immune costs of reproductive traits correlate with their  
29 resource costs, and whether increased parasitism emerges from weaker immunity.
- 30 2. We examined these relationships in wild female red deer (*Cervus elaphus*) with  
31 variable reproductive investment and longitudinal data on mucosal antibody levels and  
32 helminth parasitism. We noninvasively collected faecal samples, counting propagules  
33 of strongyle nematodes (order: Strongylida), the common liver fluke *Fasciola hepatica*  
34 and the red deer tissue nematode *Elaphostrongylus cervi*. We also quantified both total  
35 and anti-strongyle mucosal IgA to measure general and specific immune investment.
- 36 3. Contrary to our predictions, we found that gestation was associated with decreased  
37 total IgA but with no increase in parasitism. Meanwhile, the considerable resource  
38 demand of lactation had no further immune cost but was associated with higher counts  
39 of strongyle nematodes and *Elaphostrongylus cervi*. These contrasting costs arose  
40 despite a negative correlation between antibodies and strongyle count, which implied  
41 that IgA was indicative of protective immunity.
- 42 4. Our findings suggest that processes other than classical resource allocation tradeoffs  
43 are involved in mediating observed relationships between reproduction, immunity, and  
44 parasitism in wild mammals. In particular, reproduction-immunity tradeoffs may result  
45 from hormonal regulation or maternal antibody transfer, with parasitism increasing as  
46 a result of increased exposure arising from resource acquisition constraints. We  
47 advocate careful consideration of resource-independent mechanistic links and  
48 measurement of both immunity and parasitism when investigating reproductive costs.

## 49 Introduction

50 Costly traits are central to the fields of life history theory and ecoimmunology. Tradeoffs arising  
51 between reproductive investment and other aspects of life history are a fundamental prediction  
52 of the former (Harshman & Zera, 2007; Stearns, 1989; Williams, 1966), while the latter  
53 examines the ecology of costly immune responses (Graham et al., 2011; Sheldon & Verhulst,  
54 1996). Because reproduction and immunity compete for host resources, in resource-limited  
55 environments, animals that invest in reproduction should have fewer resources to allocate to  
56 immune defences (Deerenberg, Arpanius, Daan, & Bos, 1997; French, Denardo, & Moore,  
57 2007; Sheldon & Verhulst, 1996). If immunity is protective, these individuals will experience  
58 higher parasitism as a result. Intuitively, traits with higher resource demands should result in  
59 the diversion of more resources away from immunity, leading to higher parasite burdens.  
60 However, recent advances have demonstrated that the interrelationships between host  
61 resources, immunity, and parasitism can be unexpectedly complex (Cressler, Nelson, Day, &  
62 Mccauley, 2014). Few studies in wild mammals have examined tradeoffs with multiple  
63 reproductive traits, so it is unclear whether different components of reproduction have different  
64 costs for immune defence, and whether their costs are proportional to their resource demand.  
65 Furthermore, studies of reproductive tradeoffs rarely quantify both immunity and parasitism to  
66 examine the importance of susceptibility versus exposure in driving higher parasite intensities  
67 in reproductive females (Bradley & Jackson, 2008; Knowles, Nakagawa, & Sheldon, 2009).  
68 Here, we examine the partitioning of reproductive costs for multiple measures of immunity and  
69 parasitism to investigate the possible mechanisms governing a reproduction-immunity-  
70 parasitism tradeoff in a wild mammal.

71 Mammalian reproduction is a complex, multi-stage process, featuring extensive maternal  
72 investment which varies in intensity through the reproductive period (Langer, 2008;  
73 Maestriperi & Mateo, 2009). As such, different components of reproduction vary substantially  
74 in their resource and fitness costs. In particular, lactation is a highly energetically demanding  
75 process which carries costs for immunity, parasitism or fitness in a range of mammals

76 (Beasley, Kahn, & Windon, 2010; Christe, Arlettaz, & Vogel, 2000; Clutton-Brock, Albon, &  
77 Guinness, 1989; Froy, Walling, Pemberton, Clutton-brock, & Kruuk, 2016; Jones, Sakkas,  
78 Houdijk, Knox, & Kyriazakis, 2012; Rödel, Zapka, Stefanski, & von Holst, 2016; Woodroffe &  
79 Macdonald, 1995). Meanwhile, only one of these studies uncovered an immunological cost of  
80 gestation (Christe et al., 2000), which generally requires fewer resources than does lactation  
81 (Clutton-Brock et al., 1989). However, although experimentally modifying resource availability  
82 can affect the severity of reproduction-immunity tradeoffs (French et al., 2007; Jones et al.,  
83 2012), this is not always the case (Stahlschmidt, Rollinson, Acker, & Adamo, 2013). Similarly,  
84 studies in birds have questioned whether the energetic costs of immunity are sufficient to drive  
85 tradeoffs (Eraud, Duriez, Chastel, & Faivre, 2005; Svensson, Råberg, Koch, & Hasselquist,  
86 1998). Such findings imply that reproduction-immunity tradeoffs can be linked mechanistically  
87 as well as through resource reallocation. Potential such links include production of reactive  
88 oxygen species, reduction in immunologically active fat stores, or resource-independent  
89 hormonal regulation (Speakman, 2008; Svensson et al., 1998).

90 Different components of mammalian reproduction can have qualitatively different effects on  
91 host immunity as well as varying quantitatively in terms of their resource demand. For  
92 example, pregnancy necessitates modulation of the immune system to avoid mounting an  
93 immune response to the developing foetus, which will directly affect anti-parasite defence  
94 (Weinberg, 1984, 1987). Similarly, lactation draws immune molecules away from the mother  
95 for transfer to offspring, reducing their availability for the mother's own defence (Grindstaff,  
96 Brodie, & Ketterson, 2003; Hasselquist & Nilsson, 2009). Reproduction also induces a suite  
97 of physiological and behavioural changes which will affect susceptibility and exposure to  
98 parasites indirectly: for example, it has been suggested that bats compensate for the energetic  
99 demand of lactation by reducing costly grooming behaviour, with ectoparasite burden  
100 increasing as a result (Speakman, 2008). It is unclear how such mechanistic links between  
101 components of reproduction and immunity interact with resource allocation to influence  
102 immune defence and parasite intensity in wild mammals.

103 The wild red deer (*Cervus elaphus*) in the North block of the Isle of Rum exhibit a well-studied  
104 life history tradeoff, in which reproduction substantially decreases the mother's probability of  
105 overwinter survival and reproduction the following year (Clutton-Brock et al., 1989; Froy et al.,  
106 2016). However, not all components of reproduction are equally costly: gestation has a  
107 negligible detectable fitness cost compared to that of lactation (Clutton-Brock et al., 1989).  
108 Moreover, while giving birth late and caring for a male calf compared to a female calf are  
109 associated with decreased maternal fitness, their effects are small compared to the cost of  
110 lactation itself (Froy et al., 2016). The study population has a high prevalence of  
111 gastrointestinal helminths, and parasite burdens can be quantified noninvasively through  
112 faecal propagule counts (Albery et al., 2018). Mucosal antibodies, and especially the IgA  
113 isotype, are important effectors of ruminant adaptive immunity to gut helminths (Butler, 1969;  
114 McRae, Stear, Good, & Keane, 2015). Mucosal IgA can be quantified in wild ruminant faeces,  
115 correlating positively with the same isotype measured in plasma or serum and negatively with  
116 helminth faecal egg counts (Watt, Nussey, Maclellan, Pilkington, & McNeilly, 2016).

117 In this study, we measured both total and helminth-specific mucosal IgA and propagule counts  
118 of multiple helminth species, using faecal samples collected from the Isle of Rum study  
119 population. We quantified the associations between several reproductive traits of known  
120 fitness cost and subsequent measures of immunity and parasitism. We also examined  
121 covariance between IgA and parasites to discern whether increased IgA was associated with  
122 decreased parasite intensity independently of shared reproductive and seasonal effects,  
123 implicating IgA as an indicator of protective immunity. We predicted that reproductive  
124 investment would be associated with reduced antibody levels and increased parasite counts,  
125 and that aspects of reproduction previously found to be more costly for fitness, especially  
126 lactation, should likewise be more costly in terms of both immunity and parasitism.  
127 Furthermore, providing parasitism is mediated by immune susceptibility, aspects of  
128 reproduction that are costly for immunity should have similar costs in terms of parasitism.

## 129 Methods

### 130 Study system, sampling and parasitology

131 The study population is located in the North block of the Isle of Rum National Nature Reserve  
132 in the Inner Hebrides, Scotland (57°N 6°20'W). The resident population comprises ~350  
133 animals at any one time, and is regularly censused to keep track of each individual and its life  
134 history. See Clutton-Brock *et al.* (1982) for a full summary of the project and the deer  
135 reproductive cycle. Briefly, the deer mate in September and October and give birth in May-  
136 June, after an approximately 235 day gestation. Females do not reproduce every year, and  
137 produce a maximum of one calf per year. During the calving season, daily monitoring of  
138 pregnant females enables the recording of precise birth dates. Neonates are caught, sexed,  
139 weighed and individually marked, enabling life-long individual identification. Calves are  
140 dependent on their mothers for much of their first year. Regular population censusing  
141 throughout the year and winter mortality searches allow dates of death to be reliably assigned  
142 to the nearest month for the vast majority of individuals. Most calf deaths occur either within  
143 the first few weeks of life, or in the following winter ~6-9 months later. Females that  
144 successfully raise a calf to the age of one, or that lose the calf in its first winter, have lower  
145 rates of overwinter survival and reproduction the following year compared to those that do not  
146 reproduce that year or that lose their calf in the summer (Clutton-Brock *et al.*, 1989; Froy *et*  
147 *al.*, 2016). Many calves die over the winter, but the mothers of these calves have paid the cost  
148 of lactation associated with feeding them until the winter, whether or not the calf survive.  
149 Therefore these females are treated as a single category here (Clutton-Brock *et al.*, 1989;  
150 Froy *et al.*, 2016).

151 We collected faecal samples from female deer across the annual reproductive cycle. As a  
152 “deer year” runs from May to April, this study examines the effects of reproduction over a year,  
153 beginning in May, on egg counts and antibody levels until the following April. A description of  
154 the sample collection procedure can be found in Albery *et al.* (2018). Sampling occurred over  
155 seven two-week sampling trips spanning April 2016-April 2018, in August (“summer”),

156 November (“autumn”) and April (“spring”). Note that our dataset included an April sampling  
157 trip from the deer reproductive cycle starting May 2015, without an accompanying August and  
158 November trip from this reproductive cycle. Figure 1 illustrates how sampling relates to  
159 different aspects of reproductive investment by female deer across the annual cycle. We  
160 classify a female’s reproductive status for a given year as “No Calf”, “Calf Died” and “Calf  
161 Survived” (see Figure 1). “No Calf” samples were collected from females that did not  
162 reproduce in the calving season preceding the sampling trip; “Calf Died” samples were  
163 collected from females that gave birth to a calf in the preceding calving season which died  
164 before October 1<sup>st</sup> of that year; and “Calf Survived” samples were collected from females that  
165 gave birth to a calf in the preceding calving season which survived past October 1<sup>st</sup> of that  
166 year. We excluded females that were reproducing for the first time from our analyses, as their  
167 reproductive success is heavily confounded with their young age (mean age 4.21 years). In  
168 addition, females may or may not become pregnant during the autumn rut. Samples were  
169 therefore assigned a pregnancy status, beginning in November, based on whether or not the  
170 female gave birth to a calf in the following spring (Figure 1).

171 In total 837 faecal samples were collected noninvasively from 140 mature females. In the  
172 evening after collection, samples were homogenised by hand and subsampled, with 1-15g  
173 frozen at -20°C for antibody quantification and the remainder refrigerated at 4°C for  
174 parasitological analysis. Subsamples were transferred to Edinburgh at these temperatures.  
175 Parasite propagule counts were carried out as previously described, without correcting for dry  
176 weight, and included counts of strongyle nematodes, the common liver fluke *Fasciola hepatica*  
177 and the tissue nematode *Elaphostrongylus cervi* (Albery et al., 2018). Final sample sizes for  
178 each variable are displayed in Table S11.

### 179 Antibody extraction and quantification

180 Faecal antibodies were quantified using a protocol modified from Watt *et al.* (2016). Faecal  
181 matter was stored at -20°C until extraction. Extractions occurred either in January-March 2017  
182 (session “A”, samples collected April-November 2016; N=132), January 2018 (“B”, samples

183 collected April-November 2016; N=212) or within the sampling trip (“C”, samples collected  
184 April 2017-April 2018, N=460). 0.6g (+/- 0.005g) of the homogenate was weighed out into an  
185 Eppendorf tube and mixed thoroughly with 0.9ml of protease inhibitor solution (cOmplete™  
186 Mini Protease Inhibitor Cocktail tablets, Roche, Basel, Switzerland; 1 tablet mixed with 7ml  
187 Phosphate Buffered Saline). The mixture was left to stand for a minimum of 5 minutes to allow  
188 the protease to act and then centrifuged at 10,000g for 5 minutes. The supernatant was  
189 removed using a micropipette and stored in a separate Eppendorf tube at -20°C until ELISA.  
190 We measured two antibodies by ELISA: total IgA and anti-*Teladorsagia circumcincta* third  
191 larval stage IgA (anti-Tc IgA). *T. circumcincta* is an abundant and important sheep strongyle,  
192 and anti-Tc IgA correlates negatively with strongyle (order: Strongylida) faecal egg count in  
193 wild Soay sheep (Watt et al., 2016). *T. circumcincta* is also present in the Rum deer  
194 (unpublished data). ELISA plates were coated the night before using sheep-derived capture  
195 antibodies (Bethyl Laboratories, Montgomery, TX) for total IgA and with third larval stage  
196 antigen for anti-Tc IgA (Moredun Research Institute, Penicuik, Scotland). For total IgA the  
197 samples were diluted in the ratio 1:64; due to lower antibody concentrations undiluted  
198 supernatant was used for the anti-Tc IgA assay. After this stage, the ELISA protocol was  
199 carried out as described in Watt *et al.* (2016). The total IgA dilution was selected by carrying  
200 out serial dilutions on a set of samples and selecting the dilution at which different  
201 concentrations of antibodies were deemed to have the widest spread of optical densities.  
202 ELISA readings diluted linearly as expected. Samples were corrected using controls according  
203 to the calculation: Final OD=(sample OD-mean plate negative OD)/(mean plate positive OD-  
204 mean plate negative OD). All samples were run on duplicate plates, which were highly  
205 correlated (R=0.98 across all duplicates). The mean value for the two duplicates was taken  
206 for each sample and used for analysis.

## 207 **Statistical analysis**

208 We used four sets of Generalised Linear Mixed Models (GLMMs) to test how reproductive  
209 traits were associated with antibody levels and parasite intensity. Analyses were carried out



210 in R version 3.5.0 (R Core Team 2018) with the package MCMCglmm (Hadfield, 2010). All  
211 models were run for  $2.6 \times 10^6$  iterations with a 2000 iteration thinning interval and a  $6 \times 10^5$   
212 iteration burn in period.  $P_{\text{MCMC}}$  values for differences between factor categories were  
213 calculated using the proportional overlap of estimates' posterior distributions, divided by half  
214 the number of iterations.

## 215 Full models

216 We first constructed five univariate GLMMs using the full dataset (837 samples from 140  
217 individuals). Three models used an overdispersed Poisson distribution, with strongyle, *F.*  
218 *hepatica* and *E. cervi* intensity as response variables. Models initially included the following  
219 fixed effects, without interactions: Year (factor with three levels representative of the deer  
220 reproductive cycle beginning in 2015, 2016 and 2017); Season (factor with three levels:  
221 Summer, Autumn and Spring); Age in years (continuous); and Reproductive Status (factor  
222 with three levels: No Calf, Calf Died and Calf Survived). Individual identity was fitted as a  
223 random effect. All continuous variables except parasite counts were scaled to have a mean of  
224 0 and a standard deviation of 1 before analysis.

225 The two remaining models examined antibodies as response variables. As mucosal antibodies  
226 are vulnerable to degradation by temperature-dependent faecal proteases, we had to account  
227 for the extraction session and time to freezing and extraction (Figure SI5-6). There was an  
228 uneven distribution of year, season, and status categories across different extraction sessions,  
229 so that these variables could not all be fitted in the same model. Therefore, to control for  
230 collection factors and quantify reproductive status effects conservatively we first transformed  
231 antibody levels to approximate normality (square-root transform for total IgA and cube-root  
232 transform for anti-Tc IgA), and fitted a linear model with fixed effects including extraction  
233 sessions performed at different times (factor with three levels); day of collection within a  
234 sampling trip (continuous integers, range 0-11); time elapsed from sample collection until  
235 freezing (continuous, in hours). The scaled residual values from these models (mean=0,

236 SD=1) were used as the response variables in two Gaussian GLMMs with the same fixed and  
237 random effects as the parasite GLMMs.

238 Previous work on the Rum deer revealed extensive seasonal fluctuations in parasite count  
239 (Albery et al., 2018). We therefore followed up the above five models by fitting a season by  
240 reproductive status interaction in order to investigate whether the effects of reproductive status  
241 varied by season. Each model was compared with and without this interaction to investigate  
242 whether it affected Deviation Information Criterion (DIC) values as a measure of model fit  
243 (threshold values for distinguishing between models  $\Delta\text{DIC}=2$ ) or changed model estimates.

#### 244 **Pregnancy models**

245 Pregnancy may directly affect immunity, and effects attributed to reproductive status could be  
246 due to correlated variation in pregnancy status over the sampling year. To check this we ran  
247 a second set of models investigating the role of pregnancy status. This used a subset of  
248 samples collected in November and April (518 samples from 122 individuals), as mating  
249 occurs in the early autumn and females could not be pregnant in August. These five models  
250 featured the same explanatory variables as the full status models, with only two levels in the  
251 season category (Autumn and Spring), and with Pregnancy included as a binary variable. We  
252 compared these models with and without the pregnancy term as a fixed effect to investigate  
253 whether its inclusion changed reproductive status effect sizes or affected model fit.

#### 254 **Calving trait models**

255 We next used a restricted dataset consisting of individuals that had given birth in the year of  
256 sampling (571 samples from 116 individuals) to investigate whether specific traits associated  
257 with a calving event influenced antibody levels and parasitism. We fitted the same fixed and  
258 random effects as the full model set, but with only two factor levels in the reproductive status  
259 category (Calf Died and Calf Survived), and including several variables relating to each birth:  
260 Parturition Date (continuous, centred around median birth date that year); Birth Weight

261 (continuous, in kilograms, calculated from a projection using capture weight and age in hours,  
262 slope 0.01696 kg/h); Calf Sex (Female or Male).

## 263 Multivariate model

264 Multivariate mixed-effects models can be used to investigate covariance between measures  
265 of immunity and parasitism, while accounting for fixed effects. To test whether antibodies and  
266 parasites were correlated we fitted a model with strongyles, *E. cervi*, total IgA and anti-Tc IgA  
267 as response variables, with the same fixed effects as the full univariate models. Unstructured  
268 variance/covariance matrices were fitted for random and error terms, allowing estimation of  
269 the phenotypic correlations between the response variables. Phenotypic covariance between  
270 two response variables A and B ( $\text{Cov}_{\text{phenotypicA,B}}$ ) is calculated using the random (G) and  
271 residual (R) variance structure of the model, with the formula  
272  $\text{Cov}_{\text{phenotypicA,B}} = \text{Cov}_{\text{IndividualA,B}} + \text{Cov}_{\text{residualA,B}}$ . Phenotypic correlation between two response  
273 variables ( $r_{\text{phenotypicA,B}}$ ) was calculated by dividing the phenotypic covariance by the square root  
274 of the sum of the variance in both response variables:  
275  $r_{\text{phenotypicA,B}} = \text{Cov}_{\text{phenotypicA,B}} / (\text{V}_{\text{phenotypeA}} + \text{V}_{\text{phenotypeB}})^{0.5}$ .  $P_{\text{MCMC}}$  values for correlations were  
276 calculated using the posterior distributions, dividing the number of iterations overlapping with  
277 zero by half the total number of iterations.

## 278 Results

279 Reproductive investment was strongly associated with both lower antibody levels and  
280 increased parasite counts, but patterns differed considerably between different response  
281 variables (Figure 2, S11). Compared to “No Calf” individuals, “Calf Survived” status was  
282 associated with higher intensity strongyle ( $P_{\text{MCMC}} < 0.001$ ) and *E. cervi* infection ( $P_{\text{MCMC}} = 0.01$ ),  
283 and with lower total IgA ( $P_{\text{MCMC}} = 0.016$ ) and anti-Tc IgA levels ( $P_{\text{MCMC}} < 0.001$ ). “Calf Survived”  
284 females also had higher parasite counts than “Calf Died” individuals ( $P_{\text{MCMC}} < 0.001$  for  
285 strongyles and *E. cervi*), but these reproductive status categories did not differ in total IgA  
286 ( $P_{\text{MCMC}} = 0.502$ ) or anti-Tc IgA ( $P_{\text{MCMC}} = 0.336$ ; Figure 2-3). “Calf Died” individuals did not differ

287 from “No Calf” females in strongyle, *E. cervi* or anti-Tc IgA levels (Figure 2) but had lower total  
288 IgA levels ( $P_{\text{MCMC}}=0.018$ ). That is, “Calf Died” individuals had lower total IgA than “No Calf”  
289 females, but with similar parasite intensities, while “Calf Survived” individuals had the same  
290 antibody levels as “Calf Died” individuals, but with increased parasite intensities. *F. hepatica*  
291 was not associated with reproductive status, but decreased with age ( $P_{\text{MCMC}}=0.004$ ) as did *E.*  
292 *cervi* ( $P_{\text{MCMC}}<0.001$ ; Figure SI1, SI7).

293 Strongyles and both antibodies all exhibited the same seasonality, peaking in the spring and  
294 being lowest in the autumn, with the summer intermediate (Figure 3, all differences  
295  $P_{\text{MCMC}}<0.001$ ). *F. hepatica* was higher in the spring than in the summer or autumn  
296 ( $P_{\text{MCMC}}<0.034$ ), and *E. cervi* was lowest in the summer, with the autumn intermediate  
297 ( $P_{\text{MCMC}}<0.001$ ). There was also some between-year variation: strongyle levels increased  
298 between 2015 and 2016, and again in 2017 (all  $P_{\text{MCMC}}<0.001$ ), while total IgA levels decreased  
299 in 2017 compared to 2015 and 2016 ( $P_{\text{MCMC}}<0.024$ ). Anti-Tc IgA was also lower in 2017 than  
300 2016 ( $P_{\text{MCMC}}<0.001$ ). Inclusion of season-by-status interactions improved strongyle model fit  
301 ( $\Delta\text{DIC}=-3.79$ ), but did not improve the fit of any other models ( $\Delta\text{DIC}<2$ ). Fixed status effects  
302 remained largely unchanged in magnitude or significance, suggesting that the observed  
303 associations with reproductive status were consistent across seasons (Figure 3). All  
304 interaction terms implied an attenuation of reproductive status effects from summer through  
305 winter to spring, rather than any major qualitative change in this association (Figure 3). Both  
306 “Calf Died” and “Calf Survived” females had increased antibody levels and decreased parasite  
307 intensities relative to “No Calf” females over this period. See Figure SI2 for a comparison of  
308 the full model estimates and DIC changes when a season-by-status interaction was included.

309 Pregnancy models examining April and November samples revealed marginally lower total  
310 IgA in pregnant females ( $P_{\text{MCMC}}=0.034$ , Figure 2, SI1, SI3). Including pregnancy status in our  
311 models did not alter the direction or significance of reproductive status effects; in fact, in the  
312 case of total IgA and anti-Tc IgA it increased the significance of the “Calf Survived” category’s  
313 effect (Figure SI3). It also slightly improved the fit of the total IgA model ( $\Delta\text{DIC}=-3.00$ ). No

314 other models were impacted notably by the inclusion of the pregnancy term, although it slightly  
315 reduced the effect size of the “Calf Survived” category in influencing strongyle count (Figure  
316 SI3). Although the “Calf Died” category was not significant in the total IgA pregnancy model  
317 as it was in the full model, the fact that adding and removing pregnancy as a variable had very  
318 little effect on the model estimate (Figure SI3) implies that this did not arise from confounding  
319 effects of pregnancy.

320 None of the calving traits modelled (parturition date, calf birth weight or calf sex) were  
321 associated with maternal parasite or antibody levels (Figure 2, SI1).

322 The fixed effects of the multivariate model were very similar to those of the full models (Figure  
323 SI4). The raw correlations between the response variables of the model are displayed in  
324 Figures 4 and SI8. Phenotypic correlations ( $R_p$ ) derived from the variance structure of the  
325 multivariate model are as follows. There were strong positive correlations between strongyles  
326 and *E. cervi* ( $R_p=0.26$ ,  $P_{MCMC}<0.001$ ) and between total and anti-Tc IgA ( $R_p=0.424$ ,  
327  $P_{MCMC}<0.001$ ). Strongyle count was also weakly negatively correlated with total IgA ( $R_p=-$   
328  $0.074$ ,  $P_{MCMC}=0.016$ , Figure SI8) and more strongly with anti-Tc IgA ( $R_p=-0.142$ ,  $P_{MCMC}<0.001$ ,  
329 Figure 4).

## 330 Discussion

331 Lactation is associated with weaker immunity or increased parasitism in a range of mammals  
332 (Festa-Bianchet, 1989; Jones et al., 2012; Rödel et al., 2016; Woodroffe & Macdonald, 1995).  
333 In accordance with these studies, we found that lactating females had both decreased  
334 antibody levels and increased parasite counts relative to non-reproductive females. In  
335 contrast, gestation is rarely found to be costly for immunity or parasitism in mammals (Irvine,  
336 Corbishley, Pilkington, & Albon, 2006; Rödel et al., 2016; Woodroffe & Macdonald, 1995), and  
337 carries no detectable fitness cost in the Rum red deer (Clutton-Brock et al., 1989). Here, deer  
338 that gave birth to a calf that died as a neonate, thereby incurring a limited lactation cost, had  
339 lower total IgA levels than non-reproducing females. Gestation therefore carried an immune

340 cost in this study. We predicted that resource depletion incurred through investment in a given  
341 reproductive trait would lead to reduced immune investment, and that this would lead to  
342 increased parasite intensity (Knowles et al., 2009; Sheldon & Verhulst, 1996). Our results  
343 deviated from our expectations in two ways: first, gestation's long-lasting immune cost was  
344 not accompanied by increased parasite intensities. Second, the considerable additional  
345 resource investment of prolonged lactation was not associated with additional immune costs  
346 relative to gestation, but was instead associated with an increase in parasite intensity. These  
347 results have two implications: reproduction-immunity tradeoffs were unlikely to be mediated  
348 by simple resource reallocation, and reproduction-parasitism tradeoffs were unlikely to be  
349 mediated solely by immunity – despite our observation that higher immune investment was  
350 associated with lower parasite counts between individuals (Figure 4, SI8).

351 If gestation's lack of detectable fitness cost in our study population (Clutton-Brock et al., 1989)  
352 demonstrates a small resource cost, why was gestation associated with reduced total IgA  
353 levels, and why did the additional resource cost of lactation not decrease antibody levels  
354 further? First, it is possible that reproductive hormones suppress the immune system without  
355 being sensitive to resource availability (Foo, Nakagawa, Rhodes, & Simmons, 2017;  
356 Svensson et al., 1998). Similarly, gestation may lead to alterations in immune investment and  
357 antibody production, so that lower IgA resulted from selective investment in alternative  
358 immune cells or functions rather than from lower absolute resource investment in immunity.  
359 Reproductive mammals are commonly found to exhibit different (rather than weaker)  
360 immunity, but specific patterns of immune prioritisation are unpredictable. For example,  
361 reproductive vampire bats (*Desmodus rotundus*) prioritise innate over adaptive immunity  
362 (Becker et al., 2018), while reproductive rabbits (*Oryctolagus cuniculus*) exhibit reduced white  
363 blood cell counts but stronger humoral immunity (Rödel et al., 2016). Assessing whether  
364 reproductive deer invest preferentially in aspects of immunity other than mucosal antibodies  
365 would therefore necessitate examining numerous additional immune measures – however, in

366 this study we were restricted to quantifying mucosal antibodies using noninvasive faecal  
367 samples as the deer are rarely handled as adults (Clutton-Brock et al., 1982).

368 Alternatively, gestation and early lactation may necessitate export of IgA from the gut to the  
369 blood for transfer to offspring (Jeffcoate et al., 1992; Sheldrake, Husband, Watson, & Cripps,  
370 1984). In ungulates a substantial proportion of maternal antibody transfer occurs via the  
371 colostrum in the first few days of life (Hurley & Theil, 2011). It is feasible that this diversion of  
372 IgA from the gut occurs around parturition and is detectable for an extended period of time  
373 without an underlying resource allocation tradeoff, creating lower IgA levels in all reproductive  
374 females regardless of their calf's survival. The necessity of transferring immune effectors to  
375 offspring may therefore be an important obligate mechanism contributing to reduced antibody  
376 levels in reproductive wild mammals (Rödel et al., 2016). In a proposed mechanism for the  
377 periparturient rise in helminth egg count in domestic sheep, exportation of IgA from the gut  
378 around parturition releases helminths from immune control (Jeffcoate et al., 1992). However,  
379 in this study, the lower total IgA and intermediate anti-Tc IgA levels in female deer that only  
380 paid the cost of gestation were not accompanied by any change in parasitism. This is  
381 surprising, given that the results of our multivariate model implied that both IgA measures are  
382 representative of increased resistance to strongyles (Figure 4, SI8).

383 If antibody levels were indicative of investment in protective immunity, how were the deer that  
384 paid the immune cost of gestation able to maintain low strongyle and *E. cervi* intensities? Or,  
385 what produced the higher parasite counts in lactating individuals? Lactating females' anti-Tc  
386 IgA levels were significantly lower than nonreproductive females', which could explain their  
387 increased parasitism in the absence of a contrast with any other reproductive categories.  
388 However, levels of total and anti-Tc IgA in lactating females were not detectably lower than  
389 those exhibited by females that paid the cost of gestation (Figure 2). This disparity suggests  
390 that additional processes such as exposure were important in driving the high parasite  
391 intensities in lactating females (Knowles et al., 2009; Sheldon & Verhulst, 1996). The energetic  
392 and resource demand of milk production necessitates substantially increased forage intake

393 and grazing time (Hamel & Côté, 2008, 2009), and may reduce feeding selectivity or the ability  
394 to exhibit parasite avoidance behaviours (Hutchings, Judge, Gordon, Athanasiadou, &  
395 Kyriazakis, 2006; Speakman, 2008). Thus, lactating females may suffer increased exposure  
396 to infective larvae, resulting in higher parasite burdens. This mechanism offers an explanation  
397 for our observation that lactation was associated with increased parasite counts, while  
398 gestation was not, as individuals that lost their calf as a neonate were not then saddled with a  
399 necessity for such high resource acquisition. Based on our results, we suggest that severe  
400 effects of mammalian reproduction on parasite infection are partly mediated by exposure as a  
401 result of constraints on resource acquisition, foraging selectivity, and antiparasite behaviours,  
402 in addition to increased immune susceptibility.

403 Effects of foraging on exposure can profoundly affect epidemiological dynamics: for example,  
404 in the water flea *Daphnia dentifera*, temperature-induced increases in food intake can increase  
405 the magnitude of fungal pathogen epidemics (Shocket et al., 2018). Similar processes may  
406 act in the deer, if spatiotemporal variation in climatic conditions, deer density, or food  
407 abundance modify feeding behaviour or the threat of exposure. In particular, strongyle and *E.*  
408 *cervi* parasitism will be further exacerbated in years and areas of the study system where deer  
409 density is high and food availability is low (Wilson, Grenfell, Pilkington, Boyd, & Gulland, 2004).  
410 It is possible that higher parasitism in reproductive individuals will reduce their fitness, thereby  
411 producing lactation's fitness cost – and, by extension, gestation's lack of fitness cost – in this  
412 system (Clutton-Brock et al., 1989; Froy et al., 2016; Harshman & Zera, 2007; Williams, 1966).  
413 If exposure is determining parasitism and parasitism is reducing fitness, we would expect that  
414 parasite-mediated life history tradeoffs would be exacerbated in years and areas of high deer  
415 density, as more deer will translate to higher levels of pasture contamination (Wilson et al.,  
416 2004). Future investigations in this system could address the hypothesized role of parasite  
417 exposure and foraging behaviour in reproductive tradeoffs, using available census data  
418 (Clutton-Brock et al., 1982; Froy et al., 2018) to examine how annual, seasonal and spatial



419 variation in habitat use and deer density correlate with environmental larval counts, parasite  
420 intensity, and the severity of reproductive tradeoffs.

421 Reproductive tradeoffs are a potential driver of seasonal dynamics of immunity and parasitism,  
422 in which periodic reproduction-associated relaxation of immunity leads to increased parasitism  
423 (Martin, Weil, & Nelson, 2008). Our results do not support this mechanism for several reasons:  
424 all status categories exhibited seasonality of antibodies, strongyles, and *E. cervi* rather than  
425 only reproductive individuals; reproductive increases in parasitism were not linked to lower  
426 immunity; and immunity did not correlate with resource availability, being highest in April, when  
427 the deer are in poor condition, having just survived the winter. In fact, antibody levels and  
428 strongyle counts correlated positively across seasons despite their negative correlation among  
429 individuals. This suggests that seasonality of propagule output is adaptive for helminths,  
430 facilitating highest transmission when environmental conditions are favourable and  
431 immunologically naïve calves are present, and leading to seasonal upregulation of immunity  
432 in warmer months to combat increased exposure (Møller, Erritzøe, & Saino, 2003; Wilson et  
433 al., 2004).

434 This study describes unexpected and complex interrelationships between different  
435 components of mammalian reproduction, immunity, and parasitism in the wild. We suggest  
436 that classical resource allocation mechanisms which are often hypothesised to underlie  
437 tradeoffs with immunity (e.g. Sheldon & Verhulst 1996; Deerenberg *et al.* 1997; French *et al.*  
438 2007) are insufficient to explain many of the patterns seen in wild mammals, corroborating  
439 findings in other taxa (Stahlschmidt *et al.*, 2013; Svensson *et al.*, 1998). As such, studies  
440 examining such tradeoffs in mammals should consider mechanistic links between  
441 reproduction and immunity, resource acquisition limitations, and exposure components of  
442 parasitism, particularly by quantifying both immunity and parasitism simultaneously (Bradley  
443 & Jackson, 2008; Graham *et al.*, 2011). The potential complexity of such interrelationships  
444 may contribute to the relative rarity of conclusive evidence for reproduction-immunity-  
445 parasitism tradeoffs in mammals.

## 446 Acknowledgments

447 The long term red deer study is funded by the Natural Environment Research Council (grant  
448 number NE/L00688X/1), as is GFA's PhD studentship through the E3 Doctoral Training  
449 Partnership (grant number NE/L002558/1). FK receives funding from the Scottish  
450 Government, RESAS, Strategic Research Programmes 2016-21. We thank Scottish Natural  
451 Heritage for permission to work on the Isle of Rum NNR and for the support of the reserve  
452 management team on the island. Thanks to Dave McBean and Gillian Mitchell at the Moredun  
453 Research Institute for their help with parasitological methods. The *Teladorsagia circumcincta*  
454 antigen was received from Moredun Research Institute, and was prepared by David Bartley,  
455 Alison Morrison, Leigh Andrews, David Frew and Tom McNeilly. Thanks also to Eryn  
456 Macfarlane and Adam Hayward for their helpful comments on the manuscript, and to Olly Gibb  
457 and all field assistants for their help in sample collection.

## 458 Bibliography

- 459 Albery, G. F., Kenyon, F., Morris, A., Morris, S., Nussey, D. H., & Pemberton, J. M. (2018).  
460 Seasonality of helminth infection in wild red deer varies between individuals and  
461 between parasite taxa. *Parasitology*, *145*(11), 1410–1420.  
462 doi:10.1017/S0031182018000185
- 463 Beasley, A. M., Kahn, L. P., & Windon, R. G. (2010). The periparturient relaxation of  
464 immunity in Merino ewes infected with *Trichostrongylus colubriformis*: Parasitological  
465 and immunological responses. *Veterinary Parasitology*, *168*(1–2), 60–70.  
466 doi:10.1016/j.vetpar.2009.08.028
- 467 Becker, D. J., Czirják, G. Á., Volokhov, D. V., Bentz, A. B., Carrera, J. E., Camus, M. S., ...  
468 Streicker, D. G. (2018). Livestock abundance predicts vampire bat demography,  
469 immune profiles, and bacterial infection risk. *Philosophical Transactions of the Royal*  
470 *Society B, in press*, DOI: 10.1098/rstb.2017.0089. doi:10.1098/rstb.2017.0089
- 471 Bradley, J. E., & Jackson, J. A. (2008). Measuring immune system variation to help  
472 understand host-pathogen community dynamics. *Parasitology*, *135*(7), 807–823.  
473 doi:10.1017/S0031182008000322
- 474 Butler, J. E. (1969). Bovine Immunoglobulins: A Review. *Journal of Dairy Science*, *52*(12),  
475 1895–1909. doi:10.3168/JDS.S0022-0302(69)86871-2
- 476 Christe, P., Arlettaz, R., & Vogel, P. (2000). Variation in intensity of a parasitic mite  
477 (*Spinturnix myoti*) in relation to the reproductive cycle and immunocompetence of its bat  
478 host (*Myotis myotis*). *Ecology Letters*, *3*(3), 207–212. doi:10.1046/j.1461-  
479 0248.2000.00142.x
- 480 Clutton-Brock, T. H., Albon, S. D., & Guinness, F. E. (1989). Fitness costs of gestation and  
481 lactation in wild mammals. *Nature*, *337*(6204), 260–262. doi:10.1038/337260a0
- 482 Clutton-Brock, T. H., Guinness, F. E., & Albon, S. D. (1982). *Red Deer: Behavior and*  
483 *Ecology of Two Sexes* (Vol. 15). University of Chicago Press. Retrieved from  
484 [https://books.google.co.uk/books/about/Red\\_Deer.html?id=x4SGuA3t-NoC&pgis=1](https://books.google.co.uk/books/about/Red_Deer.html?id=x4SGuA3t-NoC&pgis=1)
- 485 Cressler, C. E., Nelson, W. A., Day, T., & Mccauley, E. (2014). Disentangling the interaction  
486 among host resources, the immune system and pathogens. *Ecology Letters*, *17*(3),  
487 284–293. doi:10.1111/ele.12229
- 488 Deerenberg, C., Arpanius, V., Daan, S., & Bos, N. (1997). Reproductive effort decreases  
489 antibody responsiveness. *Proceedings of the Royal Society B: Biological Sciences*,  
490 *264*(1384), 1021–1029. doi:10.1098/rspb.1997.0141

- 491 Eraud, C., Duriez, O., Chastel, O., & Faivre, B. (2005). The energetic cost of humoral  
492 immunity in the Collared Dove, *Streptopelia decaocto*: Is the magnitude sufficient to  
493 force energy-based trade-offs? *Functional Ecology*, *19*(1), 110–118.  
494 doi:10.1111/j.0269-8463.2005.00934.x
- 495 Festa-Bianchet, M. (1989). Individual Differences, Parasites, and the Costs of Reproduction  
496 for Bighorn Ewes (*Ovis canadensis*). *Journal of Animal Ecology*, *58*(3), 785–795.  
497 doi:10.2307/5124
- 498 Foo, Y. Z., Nakagawa, S., Rhodes, G., & Simmons, L. W. (2017). The effects of sex  
499 hormones on immune function: a meta-analysis. *Biological Reviews*, *92*(1), 551–571.  
500 doi:10.1111/brv.12243
- 501 French, S. S., Denardo, D. F., & Moore, M. C. (2007). Trade-Offs between the Reproductive  
502 and Immune Systems: Facultative Responses to Trade-Offs between the Reproductive  
503 and Immune Systems : Facultative Responses to Resources or Obligate Responses to  
504 Reproduction ? *The American Naturalist*, *170*(1), 79–89.
- 505 Froy, H., Börger, L., Regan, C. E., Morris, A., Morris, S., Pilkington, J. G., ... Nussey, D. H.  
506 (2018). Declining home range area predicts reduced late-life survival in two wild  
507 ungulate populations. *Ecology Letters*, *21*(7), 1001–1009. doi:10.1111/ele.12965
- 508 Froy, H., Walling, C. A., Pemberton, J. M., Clutton-brock, T. H., & Kruuk, L. E. B. (2016).  
509 Relative costs of offspring sex and offspring survival in a polygynous mammal. *Biology*  
510 *Letters*, *12*, 20160417. doi:10.1098/rsbl.2016.0417
- 511 Graham, A. L., Shuker, D. M., Pollitt, L. C., Auld, S. K. J. R., Wilson, A. J., & Little, T. J.  
512 (2011). Fitness consequences of immune responses: Strengthening the empirical  
513 framework for ecoimmunology. *Functional Ecology*, *25*(1), 5–17. doi:10.1111/j.1365-  
514 2435.2010.01777.x
- 515 Grindstaff, J. L., Brodie, E. D., & Ketterson, E. D. (2003). Immune function across  
516 generations: integrating mechanism and evolutionary process in maternal antibody  
517 transmission. *Proceedings of the Royal Society B: Biological Sciences*, *270*(1531),  
518 2309–2319. doi:10.1098/rspb.2003.2485
- 519 Hadfield, J. D. (2010). MCMC methods for multi-response generalized linear mixed models:  
520 the MCMCglmm R package. *Journal of Statistical Software*, *33*(2), 1–22.  
521 doi:10.1002/ana.22635
- 522 Hamel, S., & Côté, S. D. (2008). Trade-offs in activity budget in an alpine ungulate:  
523 contrasting lactating and nonlactating females. *Animal Behaviour*, *75*(1), 217–227.

- 524 doi:10.1016/j.anbehav.2007.04.028
- 525 Hamel, S., & Côté, S. D. (2009). Foraging decisions in a capital breeder: Trade-offs between  
526 mass gain and lactation. *Oecologia*, 161(2), 421–432. doi:10.1007/s00442-009-1377-y
- 527 Harshman, L. G., & Zera, A. J. (2007). The cost of reproduction: the devil in the details.  
528 *Trends in Ecology and Evolution*, 22(2), 80–86. doi:10.1016/j.tree.2006.10.008
- 529 Hasselquist, D., & Nilsson, J.-A. (2009). Maternal transfer of antibodies in vertebrates: trans-  
530 generational effects on offspring immunity. *Philosophical Transactions of the Royal  
531 Society B: Biological Sciences*, 364(1513), 51–60. doi:10.1098/rstb.2008.0137
- 532 Hurley, W. L., & Theil, P. K. (2011). Perspectives on immunoglobulins in colostrum and milk.  
533 *Nutrients*, 3(4), 442–474. doi:10.3390/nu3040442
- 534 Hutchings, M. R., Judge, J., Gordon, I. J., Athanasiadou, S., & Kyriazakis, I. (2006). Use of  
535 trade-off theory to advance understanding of herbivore-parasite interactions. *Mammal  
536 Review*, 36(1), 1–16. doi:10.1111/j.1365-2907.2006.00080.x
- 537 Irvine, R. J., Corbishley, H., Pilkington, J. G., & Albon, S. D. (2006). Low-level parasitic worm  
538 burdens may reduce body condition in free-ranging red deer (*Cervus elaphus*).  
539 *Parasitology*, 133(Pt 4), 465–475. doi:10.1017/S0031182006000606
- 540 Jeffcoate, I. A., Wedrychowicz, H., Fishwick, G., Dunlop, E. M., Duncan, J. L., & Holmes, P.  
541 H. (1992). Pathophysiology of the periparturient egg rise in sheep: a possible role for  
542 IgA. *Research in Veterinary Science*, 53(2), 212–218. doi:10.1016/0034-  
543 5288(92)90112-F
- 544 Jones, L. A., Sakkas, P., Houdijk, J. G. M., Knox, D. P., & Kyriazakis, I. (2012). Amelioration  
545 of the periparturient relaxation of immunity to parasites through a reduction in  
546 mammalian reproductive effort. *International Journal for Parasitology*, 42(13–14), 1127–  
547 1134. doi:10.1016/j.ijpara.2012.09.010
- 548 Knowles, S. C. L., Nakagawa, S., & Sheldon, B. C. (2009). Elevated reproductive effort  
549 increases blood parasitaemia and decreases immune function in birds: A meta-  
550 regression approach. *Functional Ecology*, 23(2), 405–415. doi:10.1111/j.1365-  
551 2435.2008.01507.x
- 552 Langer, P. (2008). The phases of maternal investment in eutherian mammals. *Zoology*,  
553 111(2), 148–162. doi:10.1016/j.zool.2007.06.007
- 554 Maestriperi, D., & Mateo, J. M. (2009). The Role of Maternal Effects in Mammalian Evolution  
555 and Adaptation. In *Maternal effects in mammals* (pp. 1–10).

- 556 doi:10.1016/j.anbehav.2010.03.020
- 557 Martin, L. B., Weil, Z. M., & Nelson, R. J. (2008). Seasonal changes in vertebrate immune  
558 activity: mediation by physiological trade-offs. *Philosophical Transactions of the Royal*  
559 *Society B: Biological Sciences*, 363(1490), 321–339. doi:10.1098/rstb.2007.2142
- 560 McRae, K. M., Stear, M. J., Good, B., & Keane, O. M. (2015). The host immune response to  
561 gastrointestinal nematode infection in sheep. *Parasite Immunology*, 37(12), 605–613.  
562 doi:10.1111/pim.12290
- 563 Møller, A. P., Erritzøe, J., & Saino, N. (2003). Seasonal Changes in Immune Response and  
564 Parasite Impact on Hosts. *The American Naturalist*, 161(4), 657–671.  
565 doi:10.1086/367879
- 566 Rödel, H. G., Zapka, M., Stefanski, V., & von Holst, D. (2016). Reproductive effort alters  
567 immune parameters measured post-partum in European rabbits under semi-natural  
568 conditions. *Functional Ecology*, 30(11), 1800–1809. doi:10.1111/1365-2435.12663
- 569 Sheldon, B. C., & Verhulst, S. (1996). Ecological immunology - costly parasite defenses and  
570 trade- offs in evolutionary ecology. *Trends in Ecology & Evolution*, 11(96), 317–321.  
571 doi:10.1016/0169-5347(96)10039-2
- 572 Sheldrake, R. F., Husband, a J., Watson, D. L., & Cripps, a W. (1984). Selective transport  
573 of serum-derived IgA into mucosal secretions. *Journal of Immunology (Baltimore, Md. :  
574 1950)*, 132(1), 363–368.
- 575 Shocket, M. S., Strauss, A. T., Hite, J. L., Šljivar, M., Civitello, D. J., Duffy, M. A., ... Hall, S.  
576 R. (2018). Temperature Drives Epidemics in a Zooplankton-Fungus Disease System: A  
577 Trait-Driven Approach Points to Transmission Via Host Foraging. *The American*  
578 *Naturalist*, 191(4), 000–000. doi:10.1086/696096
- 579 Speakman, J. R. (2008). The physiological costs of reproduction in small mammals.  
580 *Philosophical Transactions of the Royal Society B: Biological Sciences*, 363(1490),  
581 375–398. doi:10.1098/rstb.2007.2145
- 582 Stahlschmidt, Z. R., Rollinson, N., Acker, M., & Adamo, S. A. (2013). Are all eggs created  
583 equal? Food availability and the fitness trade-off between reproduction and immunity.  
584 *Functional Ecology*, 27(3), 800–806. doi:10.1111/1365-2435.12071
- 585 Stearns, S. C. (1989). Trade-Offs in Life-History Evolution. *Functional Ecology*, 3(3), 259–  
586 268. doi:10.2307/2389364
- 587 Svensson, E., Råberg, L., Koch, C., & Hasselquist, D. (1998). Energetic stress,

588 immunosuppression and the costs of an antibody response. *Functional Ecology*, 12(6),  
589 912–919. doi:10.1046/j.1365-2435.1998.00271.x

590 Watt, K. A., Nussey, D. H., Maclellan, R., Pilkington, J. G., & McNeilly, T. N. (2016). Fecal  
591 antibody levels as a noninvasive method for measuring immunity to gastrointestinal  
592 nematodes in ecological studies. *Ecology and Evolution*, 6(1), 56–67.  
593 doi:10.1002/ece3.1858

594 Weinberg, E. D. (1984). Pregnancy-Associated Depression of Cell-Mediated Immunity.  
595 *Reviews of Infectious Diseases*, 6(6), 814–831. doi:10.2307/4453516

596 Weinberg, E. D. (1987). Pregnancy-associated immune suppression: risks and mechanisms.  
597 *Microbial Pathogenesis*, 3(6), 393–397. doi:10.1016/0882-4010(87)90009-X

598 Williams, G. C. (1966). Natural Selection, the Costs of Reproduction, and a Refinement of  
599 Lack's Principle. *The American Naturalist*, 100(916), 687–690.

600 Wilson, K., Grenfell, B. T., Pilkington, J. G., Boyd, H. E. G., & Gulland, F. M. D. (2004).  
601 Parasites and their impact. In T. Clutton-Brock and J. Pemberton (Ed.), *Soay Sheep:  
602 Dynamics and Selection in an Island Population* (pp. 113–165). Cambridge University  
603 Press.

604 Woodroffe, R., & Macdonald, D. W. (1995). Costs of breeding status in the European badger  
605 , *Meles meles*. *Journal of Zoology London*, 235, 237–245.

606

607

# Figures

608  
609  
610

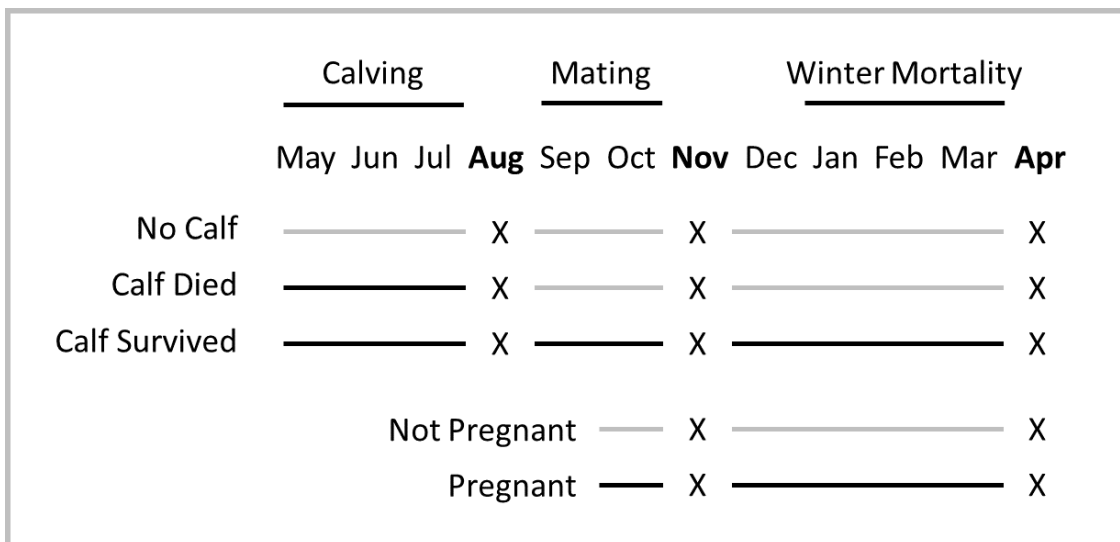

611  
612

613 Figure 1: The faecal sampling regime in the context of a deer reproductive cycle (“deer  
614 year”). A cross (X) represents a two-week sampling trip. The deer year begins on May 1<sup>st</sup>  
615 when calving begins; individuals are assigned to one of three reproductive status categories  
616 (top three lines) according to the birth and survival of their calf over the course of the  
617 following year. Individuals are also assigned a pregnancy status in November and April  
618 based on reproduction in the following calving season (bottom two lines). Black lines  
619 represent periods in which the calf is living or the female is pregnant; grey lines represent  
620 periods in which the calf is dead or non-existent or the female is not pregnant.

621  
622  
623



624

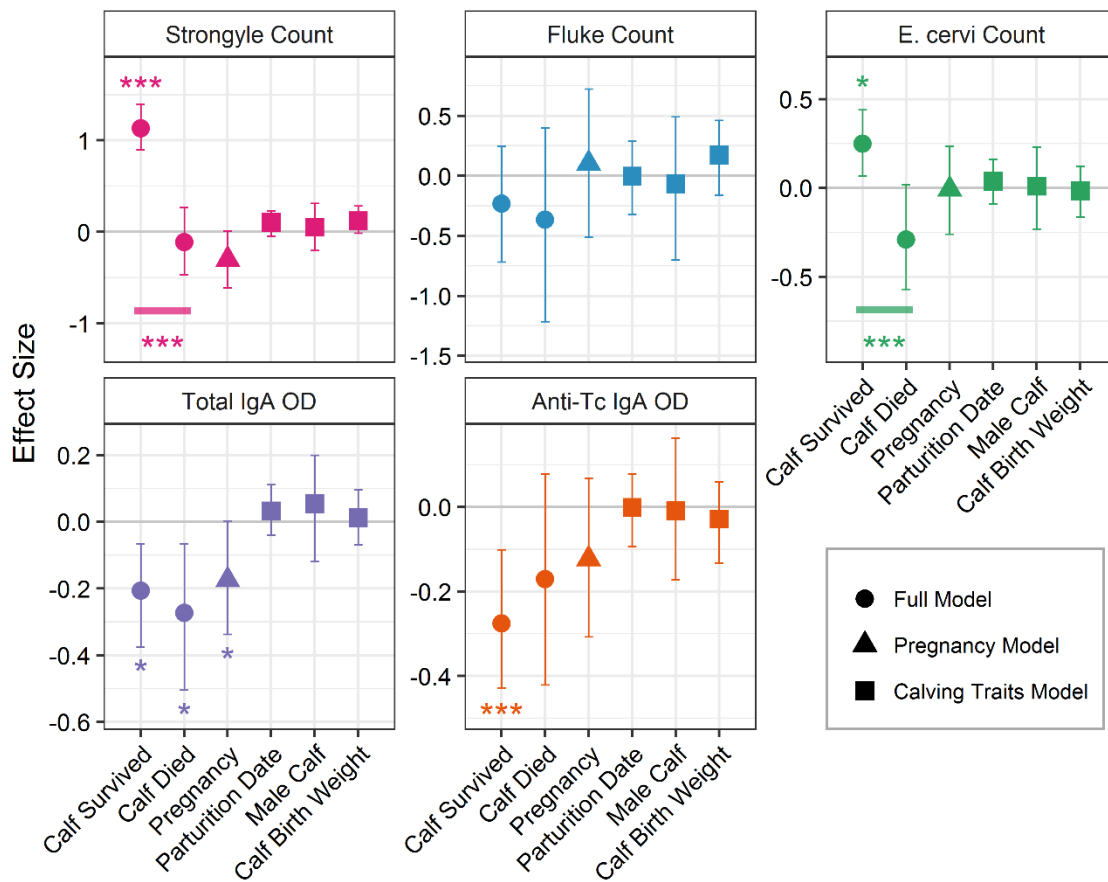

625

626 Figure 2: Model outputs depicting the effects of reproductive traits, derived from all three  
 627 univariate model sets. Points and error bars represent model estimates and 95% credibility  
 628 estimates. Effect sizes for categorical variables (status, pregnancy and calf sex) denote  
 629 differences from the first (absent) category of each, contained in the intercept (“No Calf”,  
 630 “Not Pregnant” and “Female Calf” respectively). Effect sizes for continuous variables  
 631 (parturition date and calf birth weight) represent the change in the response variable  
 632 associated with a change of one standard deviation of the explanatory variable. Asterisks  
 633 represent significant differences derived from MCMCglimm posterior distribution overlaps:  
 634 \*\*\*, \*\* and \* denote  $P < 0.001$ ,  $P < 0.01$  and  $P < 0.05$  respectively. Bars denote differences  
 635 between status categories.

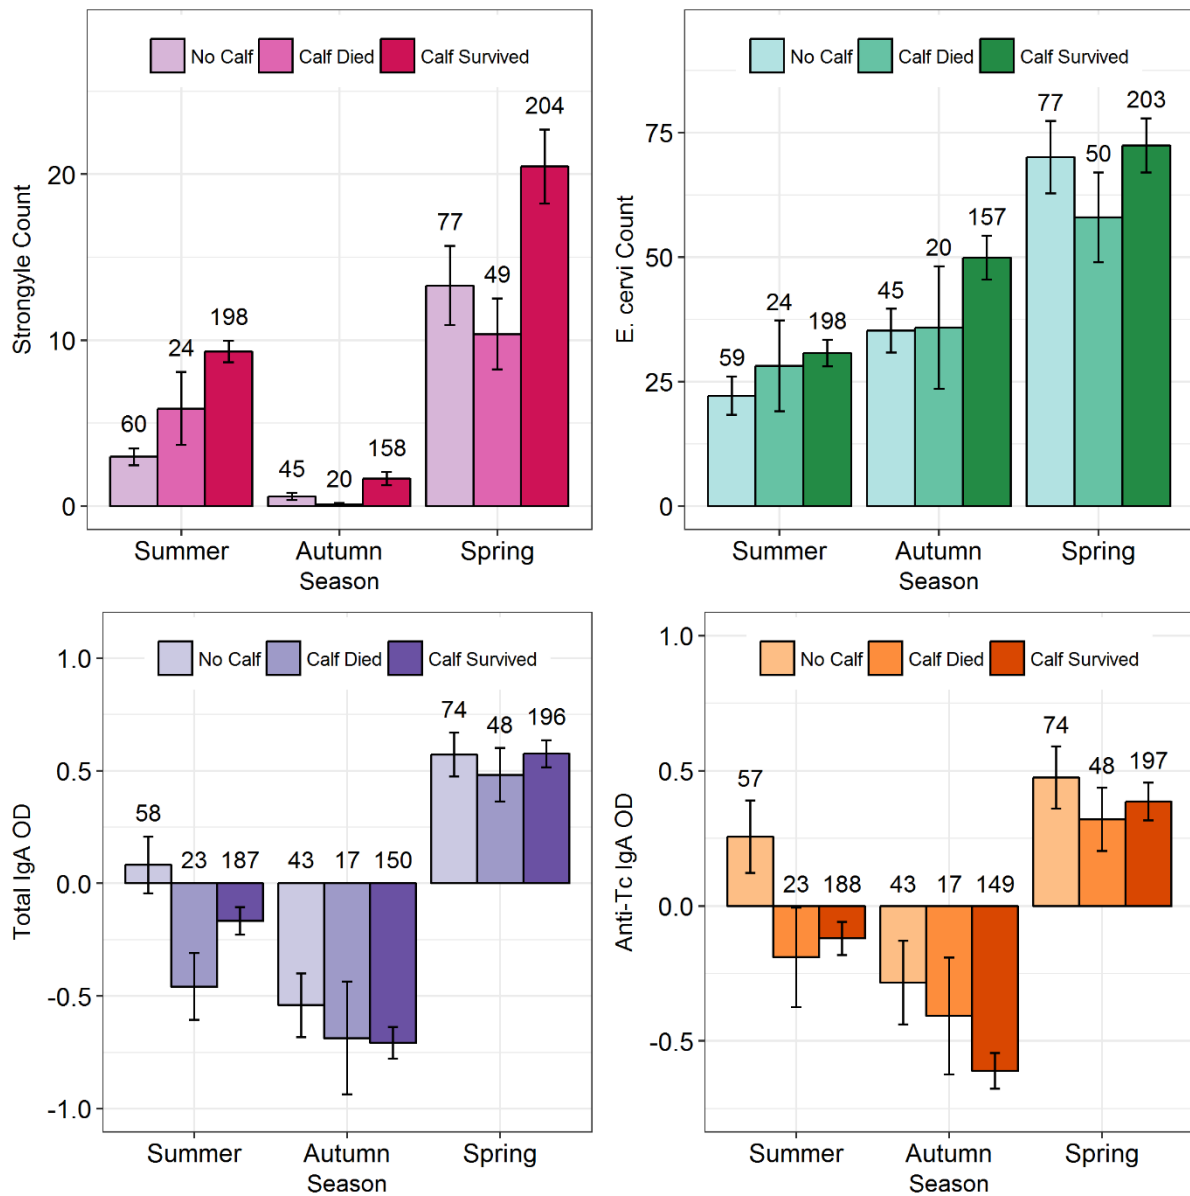

636

637

638 Figure 3: Bar charts displaying raw mean (+/- SE) parasite counts and antibody levels of  
 639 each reproductive status category in each season. Antibody measures were taken from the  
 640 residuals of a model with square root-transformed (total IgA) or cube root-transformed (anti-  
 641 Tc IgA) antibody OD as the response variable and including collection variables as fixed  
 642 effects. Numbers above bars denote sample sizes.

643

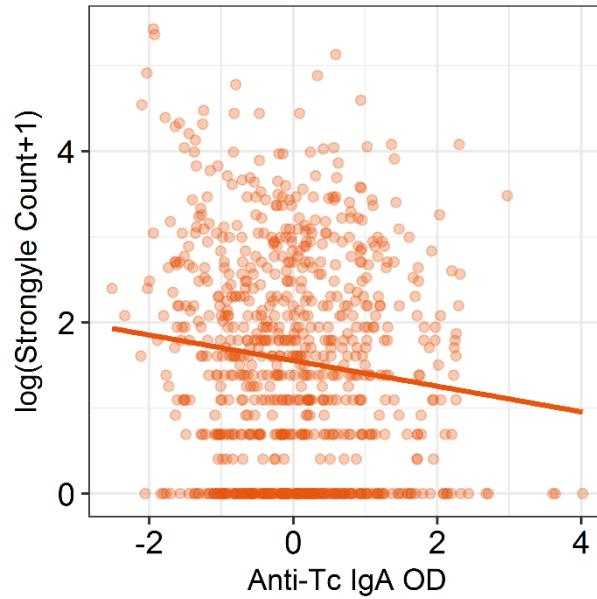

644

645

646 Figure 4: Correlation between anti-*Teladorsagia circumcincta* IgA levels and strongyle count,  
647 using the raw data. Individuals with higher anti-Tc IgA had lower strongyle counts  
648 (multivariate model phenotypic correlation  $R_p = -0.142$ ,  $P_{\text{MCMC}} < 0.001$ ). The y axis is on the  
649  $\log_e(\text{count}+1)$  scale to aid interpretation; the x axis data were taken from the residuals of a  
650 model with cube root-transformed anti-Tc IgA as the response variable and including  
651 collection variables as fixed effects. For this figure, these residuals were centred within  
652 sampling trips to have a mean of 0 and a standard deviation of 1 to avoid a positive  
653 correlation arising from shared seasonal and annual effects.

654

655 Supplementary information for Albery et  
656 al., (2018): Reproduction has different  
657 costs for immunity and parasitism in a wild  
658 mammal

659 Section One: Table SI1

660

| Factor                    | Prevalence (%) | Model Sample Sizes |           |                | Repeatability    |
|---------------------------|----------------|--------------------|-----------|----------------|------------------|
|                           |                | Full               | Pregnancy | Calving Traits |                  |
| <b>Strongyles</b>         | 76             | 835                | 518       | 571            | 0.21 (0.16-0.28) |
| <b><i>F. hepatica</i></b> | 33             | 824                | 517       | 571            | 0.11 (0.06-0.17) |
| <b><i>E. cervi</i></b>    | 95             | 833                | 518       | 571            | 0.39 (0.34-0.45) |
| <b>Total IgA</b>          |                | 796                | 499       | 550            | 0 (0-0.08)       |
| <b>Anti-Tc IgA</b>        |                | 796                | 497       | 547            | 0.25 (0.17-0.32) |

661

662 Table SI1: model sample sizes and repeatabilities (95% credibility intervals in brackets).

## 663 Section Two: Model output

664 This section includes model outputs for the fixed effects of all models we ran. We first include  
665 the main models reported in the study (Figure SI1). We then compare these results with a set  
666 of modifications that we investigated.

667 The next (Figure SI2) displays the full models including a season by status interaction to  
668 display the way this affected the estimates, and to demonstrate the seasonal effects.  
669 Generally, including a season by status interaction did not improve the model fit or change our  
670 findings. The exception for this is the strongyle model (delta DIC = -3.79). There was, however,  
671 a general trend for the differences between status categories to decrease over the autumn  
672 and spring seasons as can be seen in Figure 3 in the main text.

673 Figure SI3 displays the effects from pregnancy models when we either included or removed  
674 pregnancy as a fixed effect, to investigate whether this affected the estimates of each status  
675 category's effect. Inclusion of the pregnancy term slightly reduced the significance of the "Calf  
676 Survived" effect in the strongyle model, and increased the effects of "Calf Survived" in both  
677 the total IgA and anti-Tc IgA models. It also improved the fit of the total IgA model (delta DIC  
678 = -3.71). Otherwise, pregnancy had little effect.

679 Figure SI4 displays the results from the full models again, compared with the results from the  
680 multivariate models. The models were extremely similar, with only small changes in effect  
681 sizes and significance. This validates our use of the model to derive phenotypic correlations.

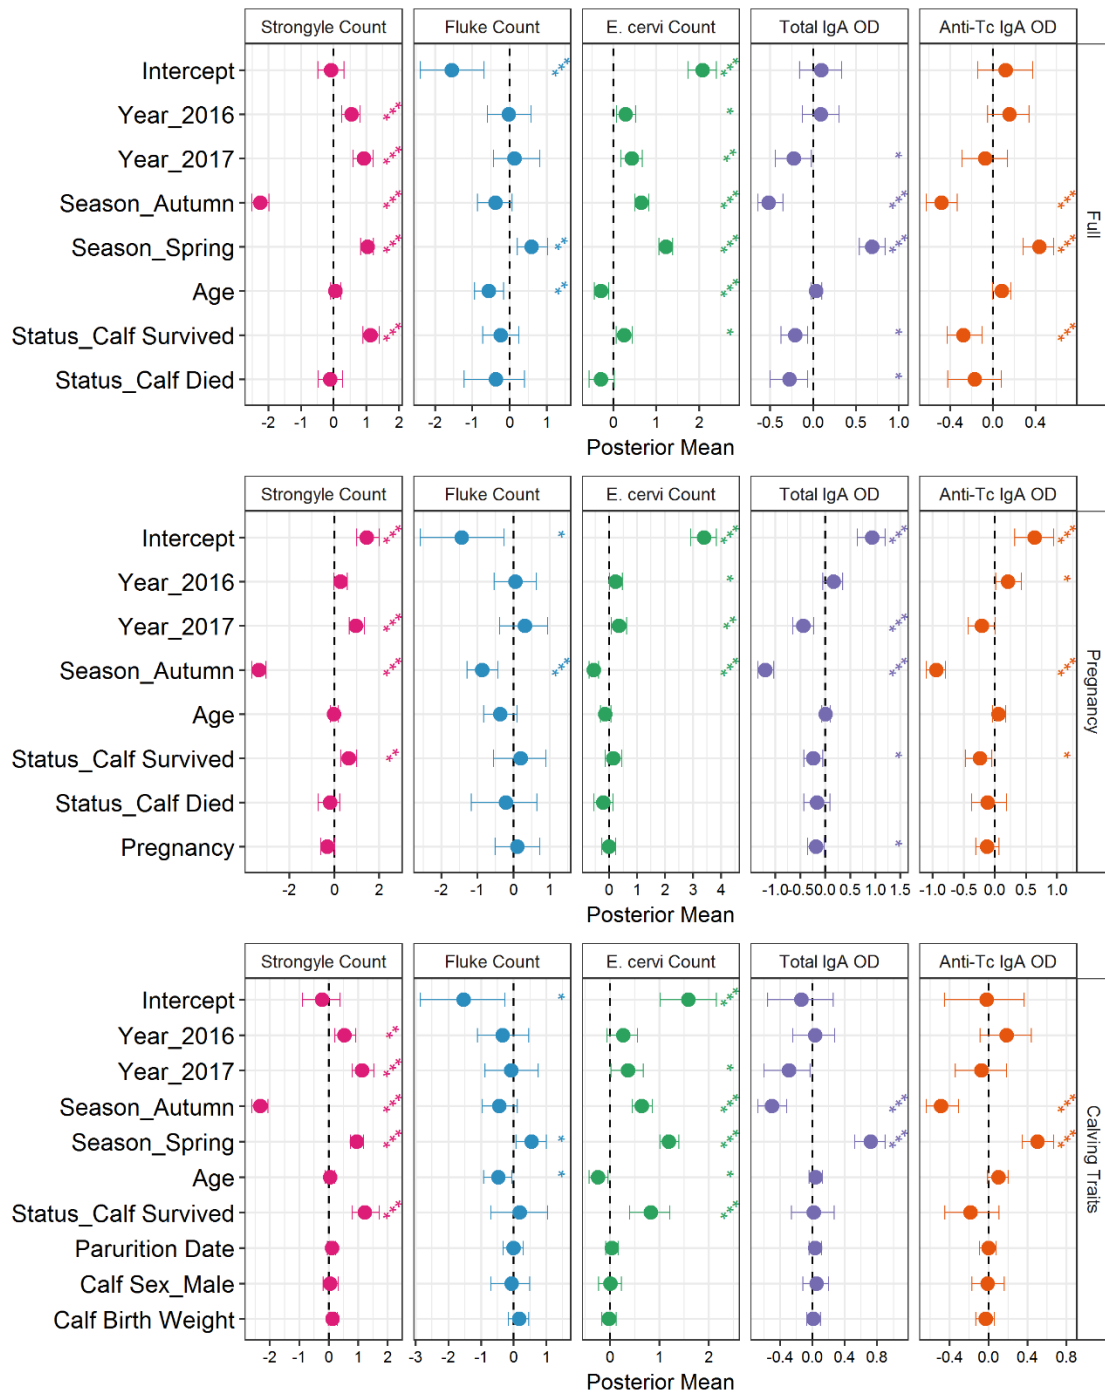

682

683 Figure S11: Effect size estimates from the three model sets (full dataset, pregnancy models  
 684 and calf traits models). Effect sizes for categorical variables denote differences from the first  
 685 (absent) category of each, contained in the intercept. Effect sizes for continuous variables  
 686 represent the change associated with a change of one standard deviation of the variable in  
 687 question. Points and error bars represent model estimates and 95% credibility estimates for  
 688 each of the five full models. Asterisks indicate the significance of variables: \*\*\*, \*\* and \*  
 689 indicate P < 0.001, P < 0.01 and P < 0.05 respectively.

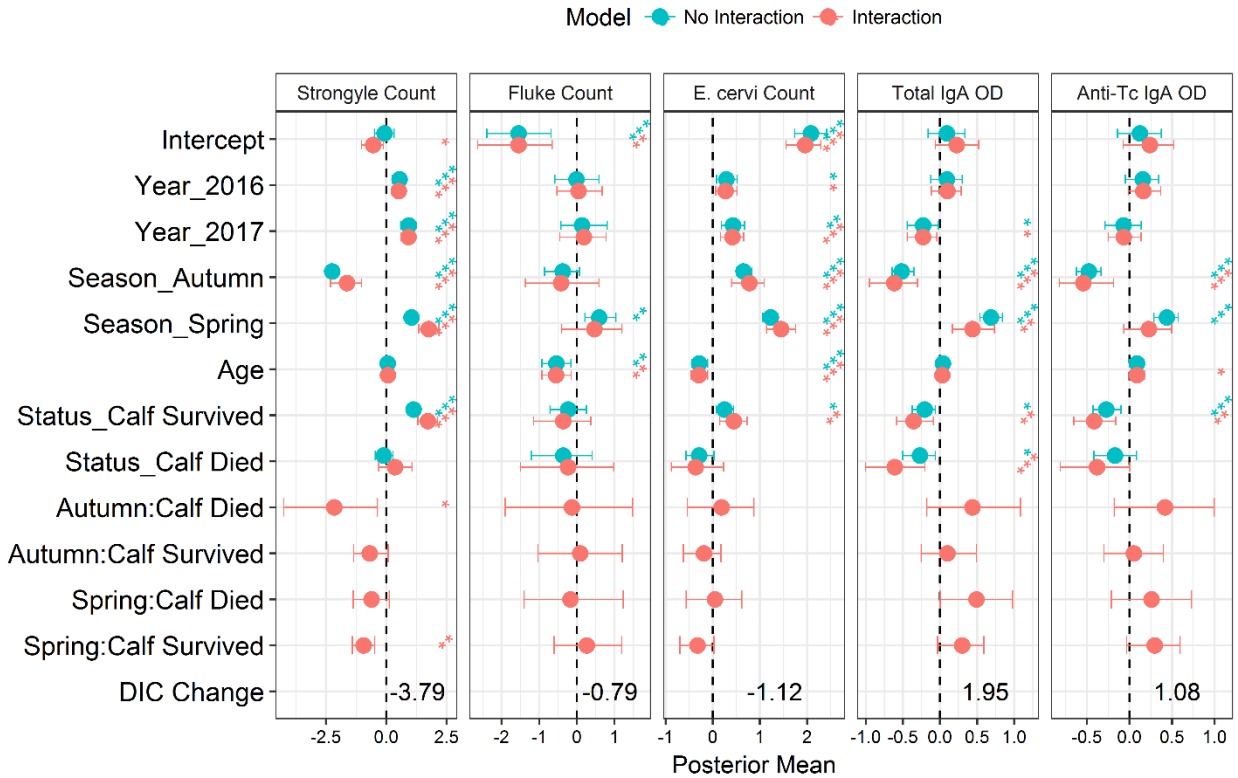

690

691 Figure S12: Comparison between outputs from full models excluding and including a season  
 692 by status interaction. Points and error bars represent model estimates and 95% credibility  
 693 estimates for each of the five full models, with and without interactions. Effect sizes for  
 694 categorical variables denote differences from the first (absent) category of each, contained in  
 695 the intercept. Effect sizes for continuous variables represent the change associated with a  
 696 change of one standard deviation of the variable in question. Asterisks indicate the  
 697 significance of variables: \*\*\*, \*\* and \* indicate  $P < 0.001$ ,  $P < 0.01$  and  $P < 0.05$  respectively.  
 698 DIC Change represents the change in DIC that occurred when an interaction was included.  
 699 Including an interaction did not have a substantial effect on most of the original estimates,  
 700 and only the fit of the strongyle model was significantly improved by its inclusion.

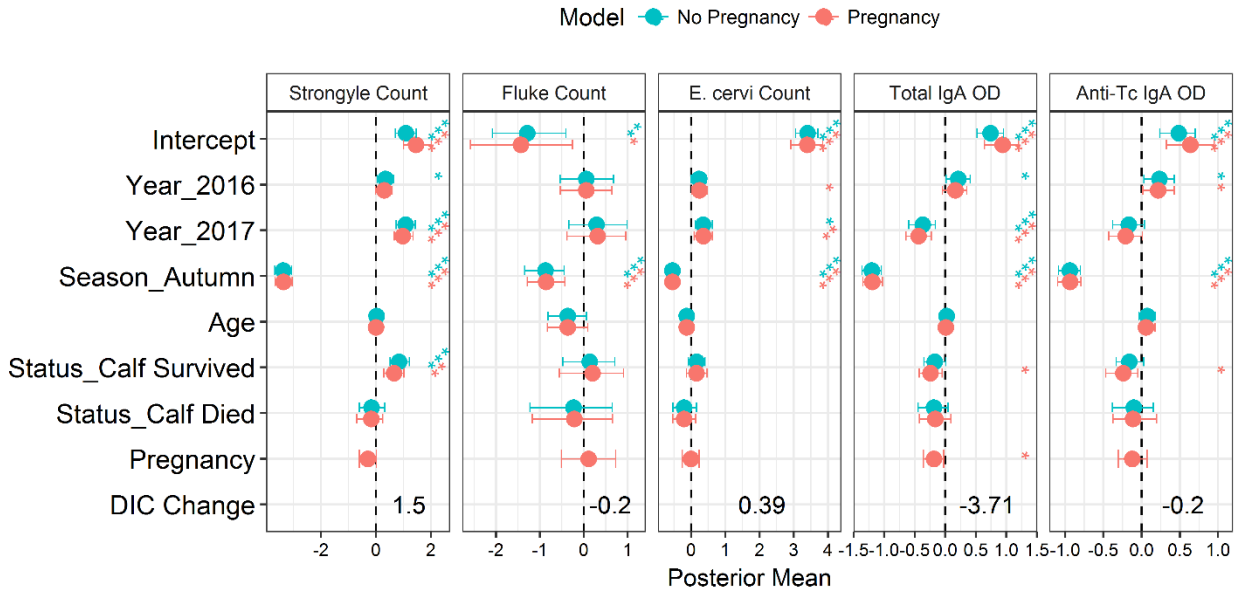

701

702 Figure S13: Comparison between outputs from pregnancy models, excluding and including  
703 pregnancy as a covariate to investigate whether this changed the model estimates for the  
704 reproductive status categories. Points and error bars represent model estimates and 95%  
705 credibility estimates for each of the five full models, without and with pregnancy as a  
706 covariate. Effect sizes for categorical variables denote differences from the first (absent)  
707 category of each, contained in the intercept. Effect sizes for continuous variables represent  
708 the change associated with a change of one standard deviation of the variable in question.  
709 Asterisks indicate the significance of variables: \*\*\*, \*\* and \* indicate  $P < 0.001$ ,  $P < 0.01$  and  
710  $P < 0.05$  respectively. DIC Change represents the change in DIC that occurred when  
711 pregnancy was included. Including pregnancy as a covariate slightly decreased the effect  
712 size of “Calf Survived” for strongyles and increased it for total IgA and anti-Tc IgA, but  
713 otherwise had little effect on the estimates. Pregnancy also significantly reduced total IgA  
714 levels and improved the total IgA model fit.



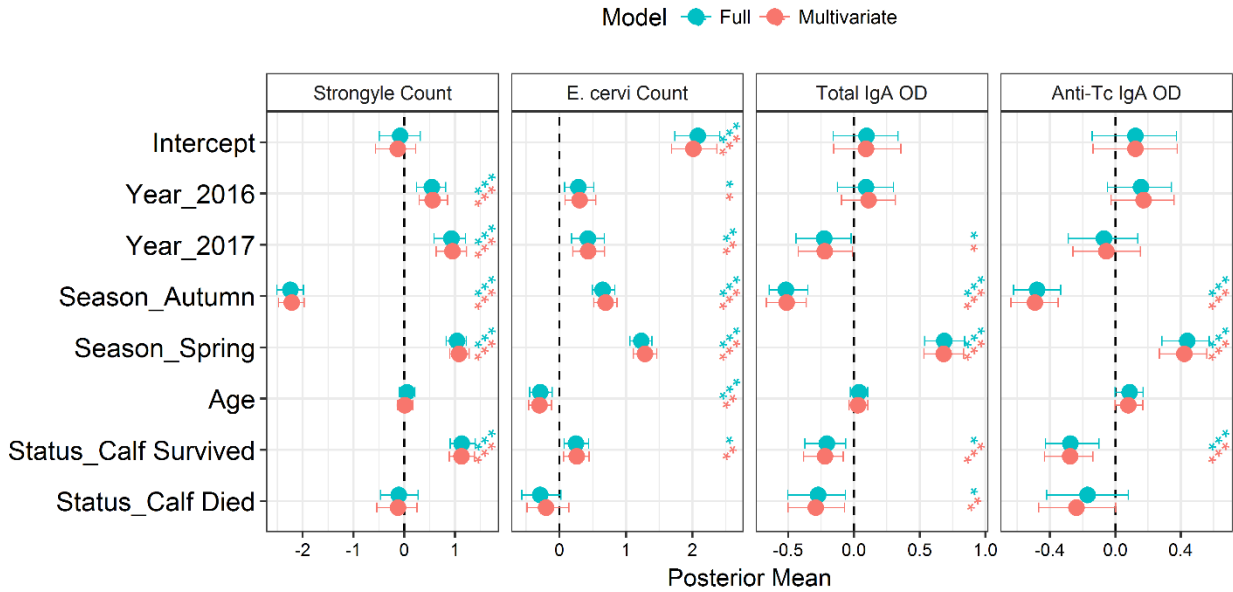

715

716 Figure SI4: Comparison of the fixed effect estimates from the full models and the multivariate  
717 model. Points and error bars represent model estimates and 95% credibility estimates for  
718 each of the five full models and the equivalent fixed effects in the multivariate model. Effect  
719 sizes for categorical variables denote differences from the first (absent) category of each,  
720 contained in the intercept. Effect sizes for continuous variables represent the change  
721 associated with a change of one standard deviation of the variable in question. Asterisks  
722 indicate the significance of variables: \*\*\*, \*\* and \* indicate  $P < 0.001$ ,  $P < 0.01$  and  $P < 0.05$   
723 respectively.

724 Section Three: Additional Figures

725 This section contains some figures displaying patterns in the data which are of interest. This  
726 includes the effects of faecal collection variables on antibody levels, age effects and  
727 correlations between response variables.

728

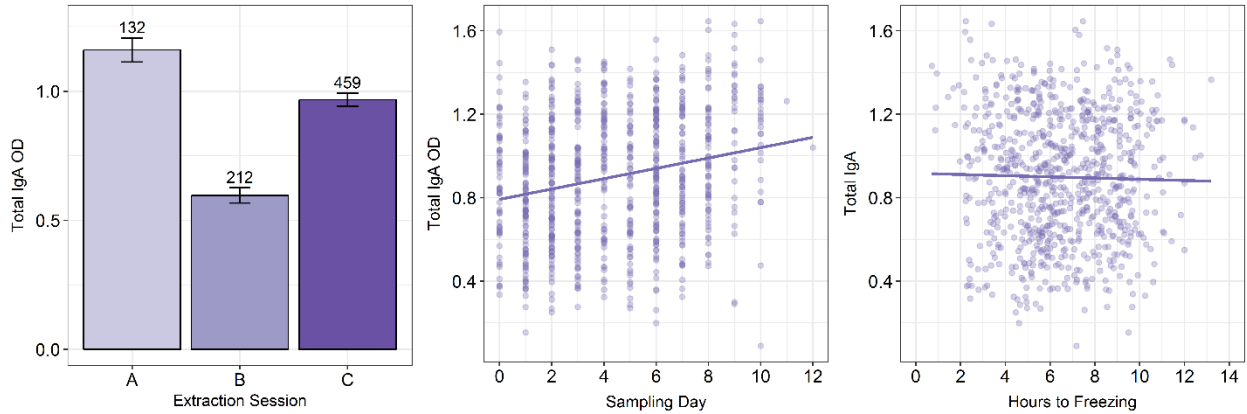

729

730

731 Figure SI5: Impact of faecal collection factors on total IgA level (extraction session, day of  
732 collection and hours to freezing). Y axes for figures B and C have been square root  
733 transformed.

734

735

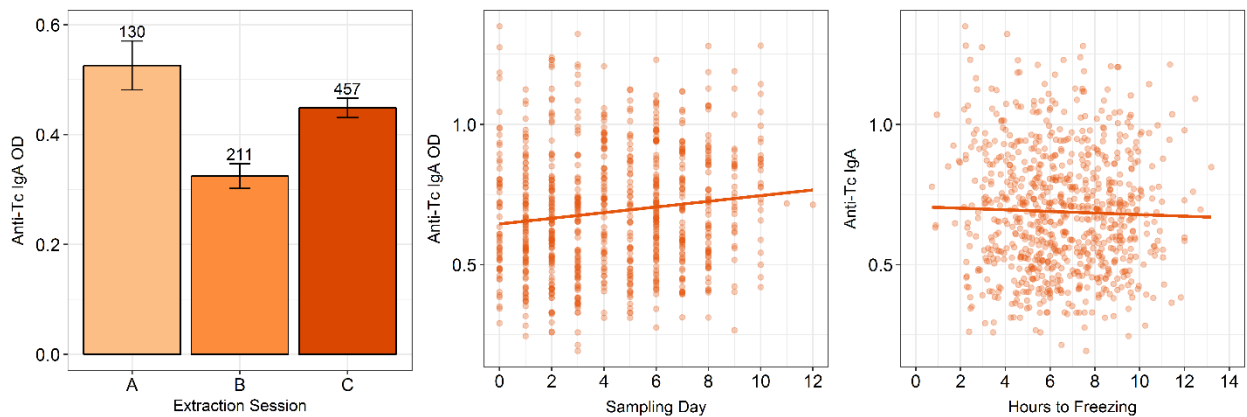

736

737

738 Figure SI6: Impact of faecal collection factors on anti-Tc IgA level (extraction session, day of  
739 collection and hours to freezing). Y axes for figures B and C have been cube root  
740 transformed.

741

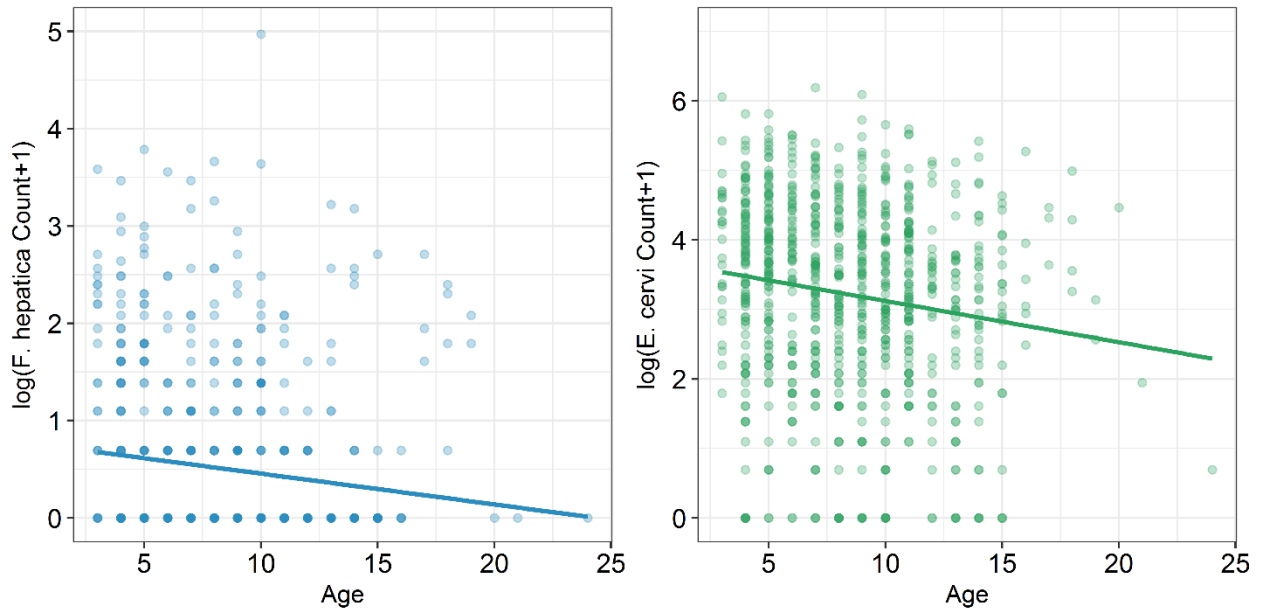

742

743 Figure S17: Age trends in parasite counts using the raw correlations (*F. hepatica* and *E.*  
744 *cervi*). Y axes have been log(count+1)-transformed.

745

746

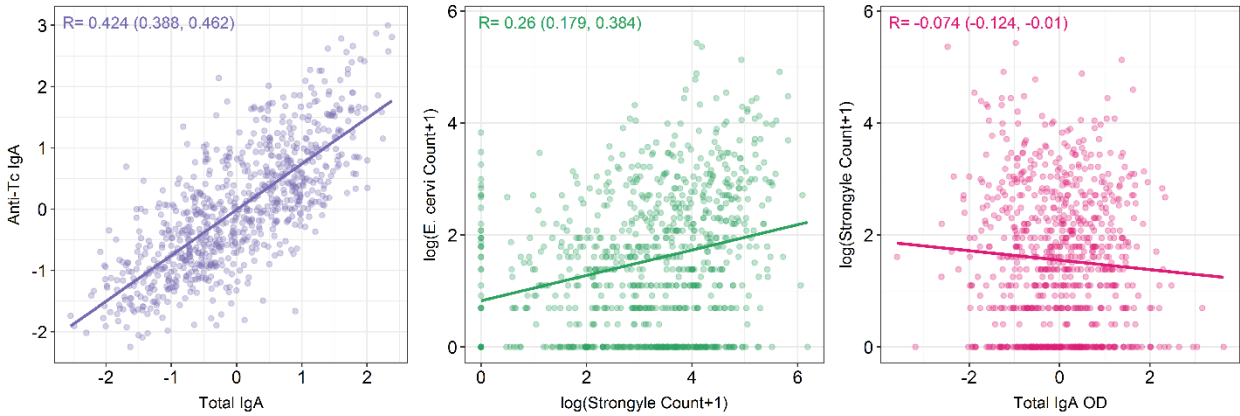

747

748 Figure S18: Correlations between response variables (Total IgA and anti-Tc IgA; Strongyles  
749 and *E. cervi*; Total IgA and Strongyles). Model-derived phenotypic correlations ( $R_p$ ) are  
750 included, with 95% credibility intervals. Both antibody measures are based on the residuals  
751 from a model including extraction session, day of collection and hours to freezing, with  
752 transformed antibody OD as response variable (square root for the total IgA and cube root for  
753 anti-Tc IgA). In the strongyle figure total IgA was scaled within each sampling trip to have a  
754 mean of 0 and a standard deviation of 1 to avoid a positive correlation arising from shared  
755 seasonal effects.
